# Supplementary material for: SARS-CoV-2 diversity and transmission on a university campus across two academic years during the pandemic
Source: bioRxiv or medRxiv preprint supplement (doi:10.1101/2024.02.29.24303285), 2024-03-02
Supplement: Supplementary file [file media-2.pdf]

## SUPPLEMENTAL TABLE

### **Data Availability**

GISAID Identifier: EPI\_SET\_240110xb

doi: [10.55876/gis8.240110xb](https://doi.org/10.55876/gis8.240110xb)

All genome sequences and associated metadata in this dataset are published in GISAID's EpiCoV database. To view the contributors of each individual sequence with details such as accession number, Virus name, Collection date, Originating Lab and Submitting Lab and the list of Authors, visit [10.55876/gis8.240110xb](https://gisaid.org/gis8.240110xb)

### **Data Snapshot**

- EPI\_SET\_240110xb is composed of 130,685 individual genome sequences.
- The collection dates range from 2020-09-01 to 2022-09-30;
- Data were collected in 1 countries and territories;
- All sequences in this dataset are compared relative to hCoV-19/Wuhan/WIV04/2019 (WIV04), the official reference sequence employed by GISAID (EPI\_ISL\_402124). Learn more at <https://gisaid.org/WIV04>.
